# Supplementary material for: Identification of MicroRNAs from Eugenia uniflora by High-Throughput Sequencing and Bioinformatics Analysis
Source: PubMed Central journal article supplement (PMC3499529; doi:10.1371/journal.pone.0049811), 2012-11-15

**Figure S2.** Predicted secondary structures of the conserved and novel miRNA precursors of *E. uniflora* and the locations of the more abundant mature miRNAs.

eun-MIR156

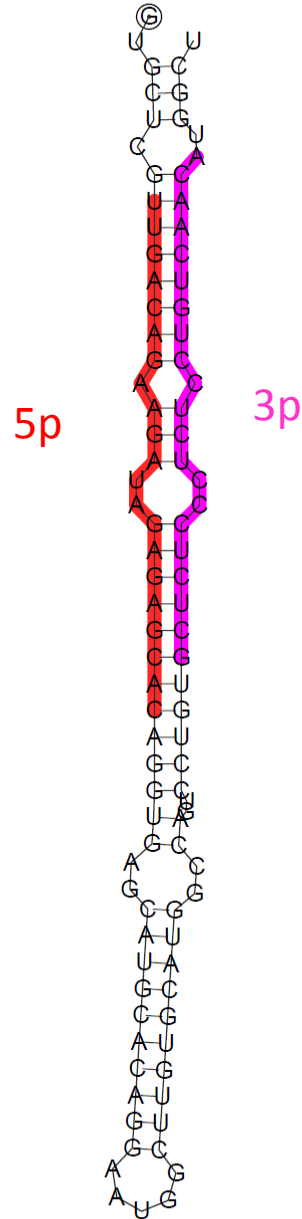

eun-MIR159

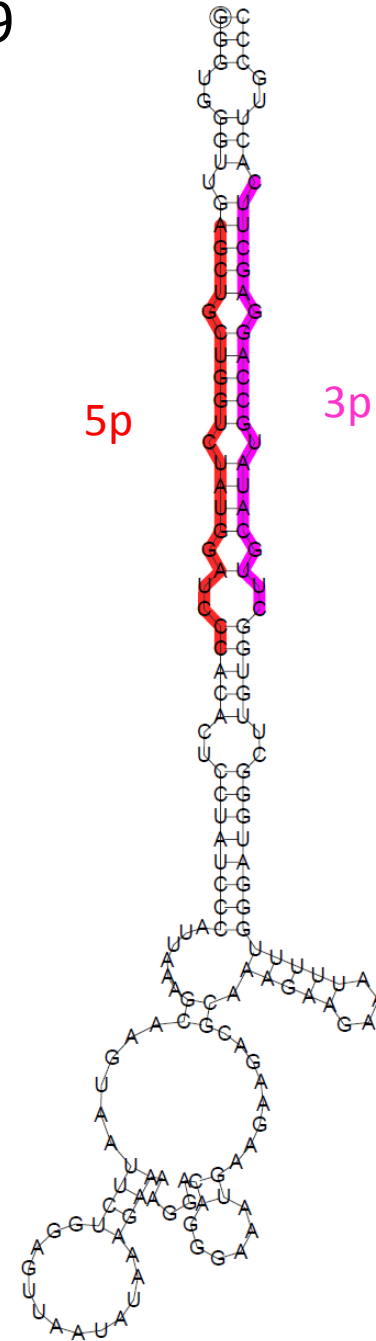

eun-MIR160

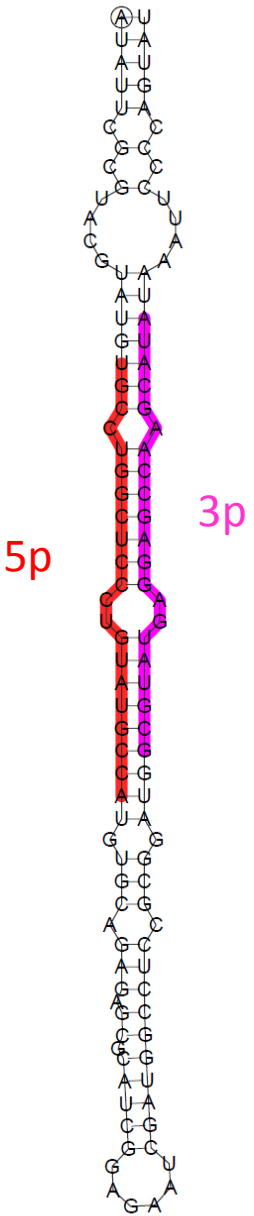

eun-MIR162

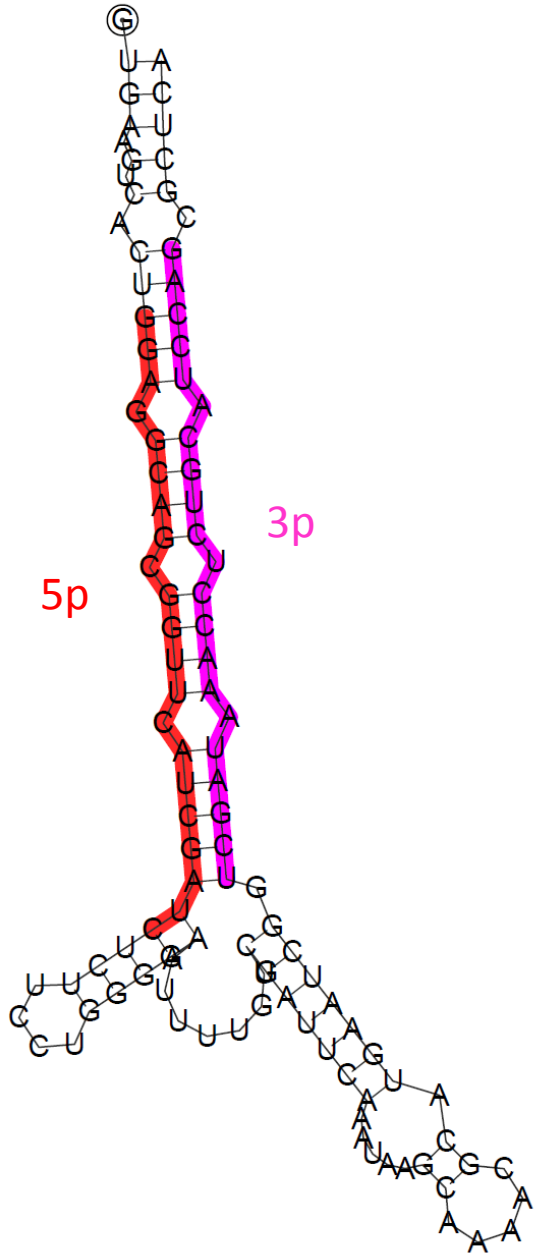

eun-MIR166

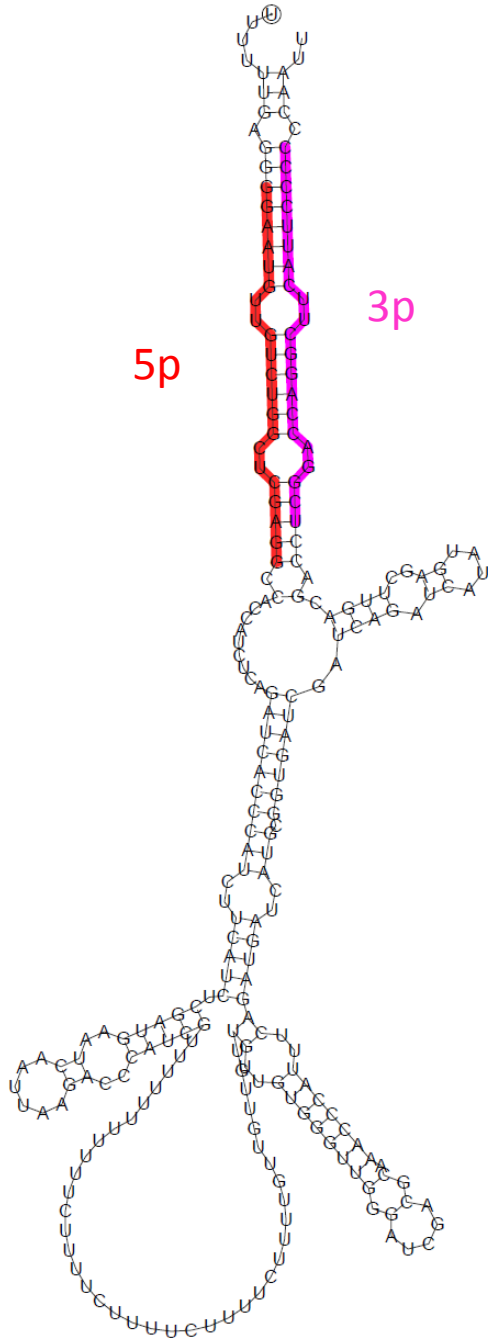

eun-MIR167-1

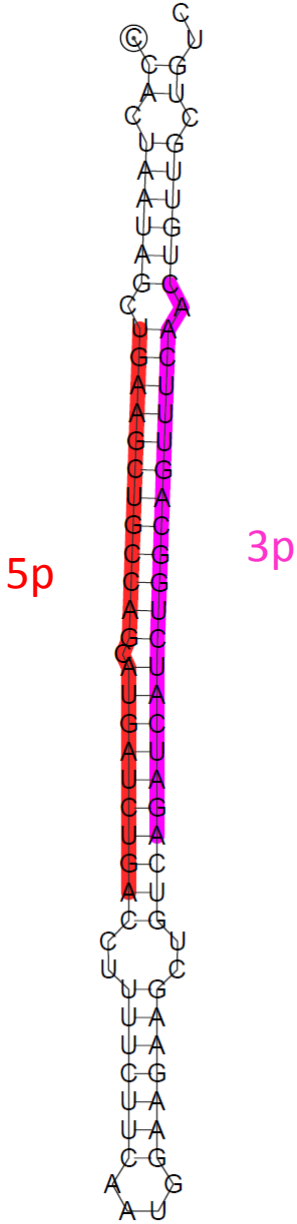

eun-MIR167-2

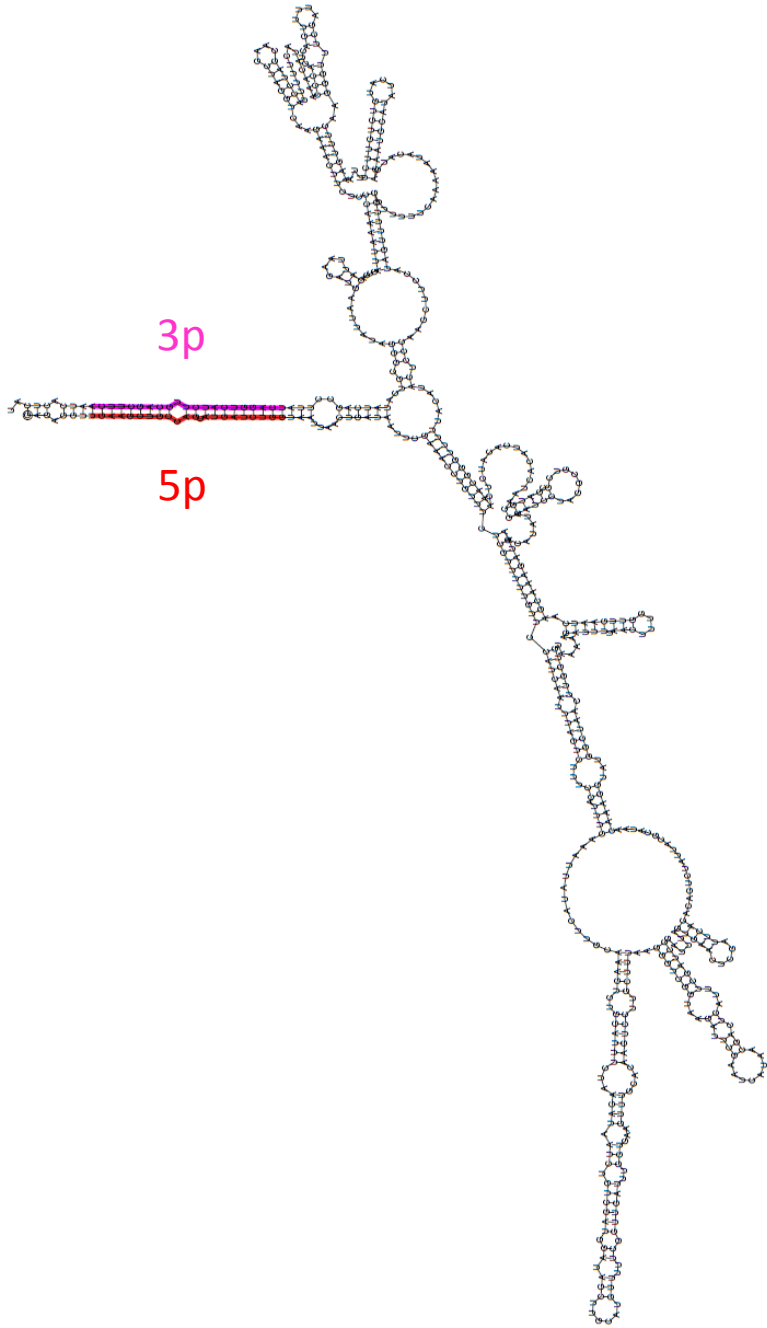

eun-MIR167-3

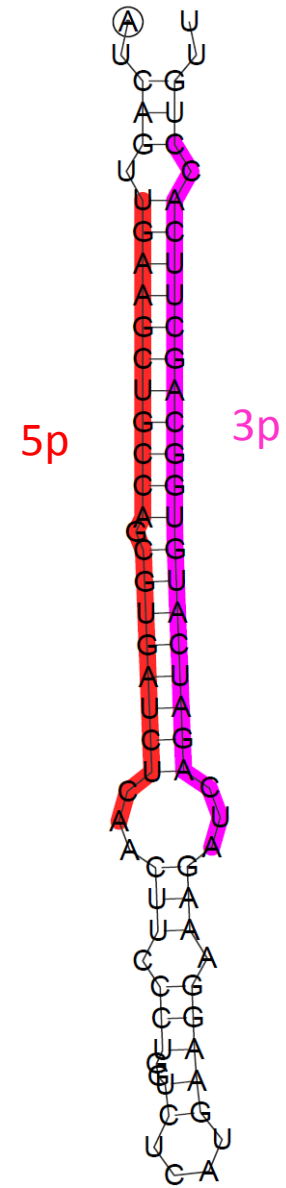

eun-MIR167-4

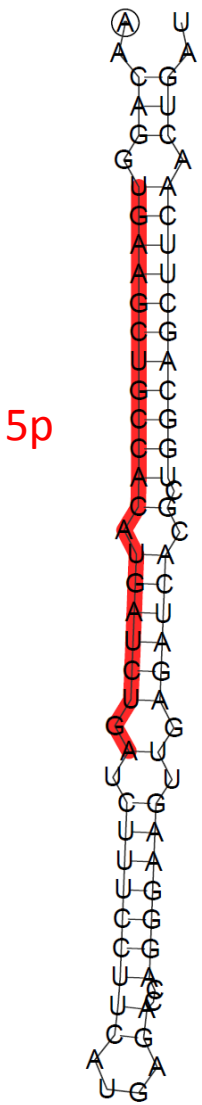

eun-MIR169

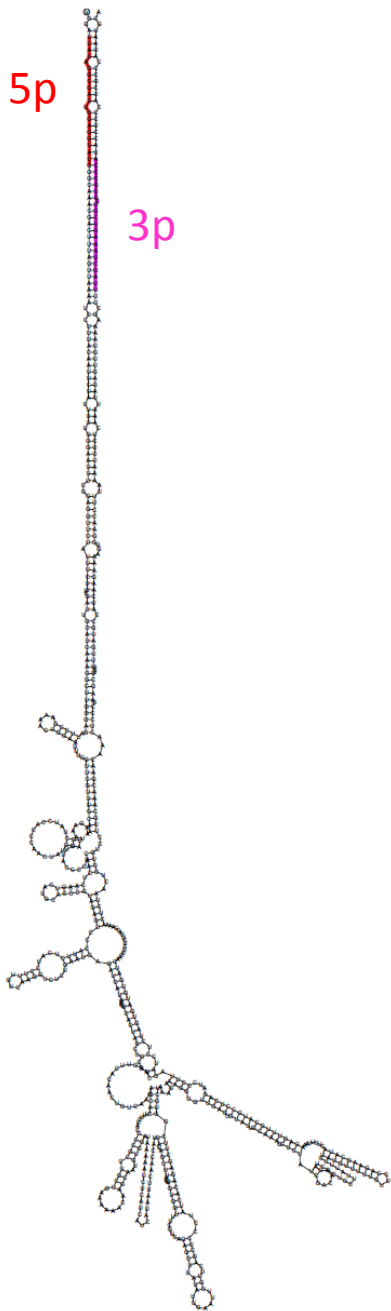

eun-MIR172-1

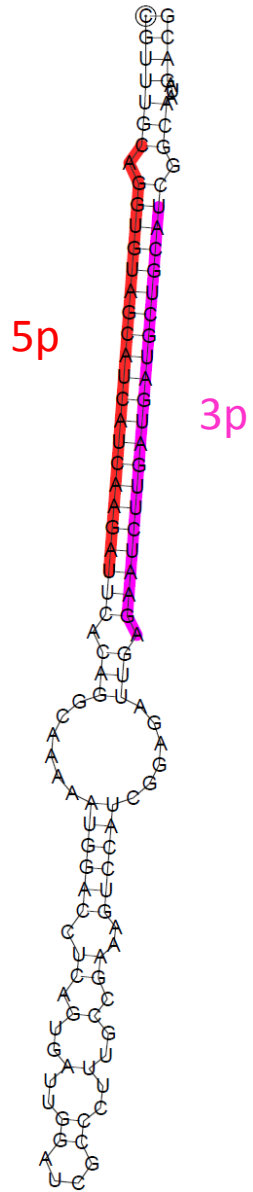

eun-MIR172-1

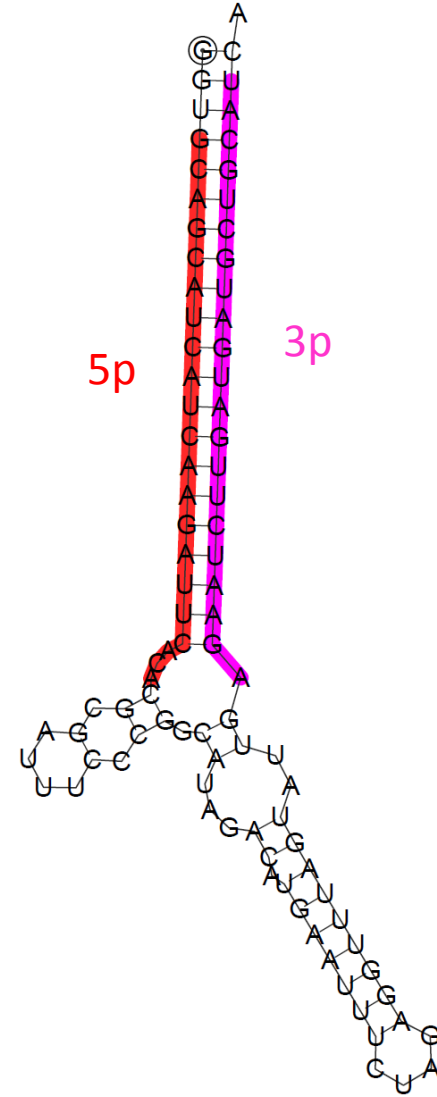







eun-MIR397-1

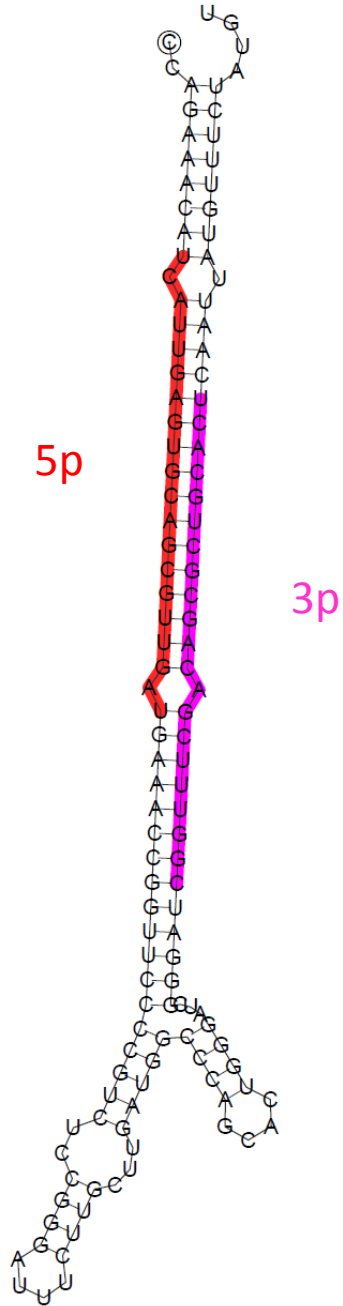

eun-MIR397-2

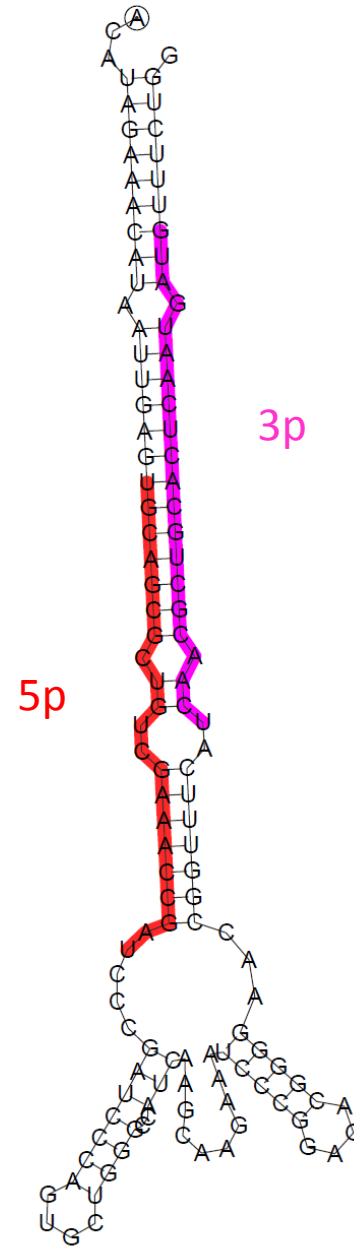

eun-MIR482-1

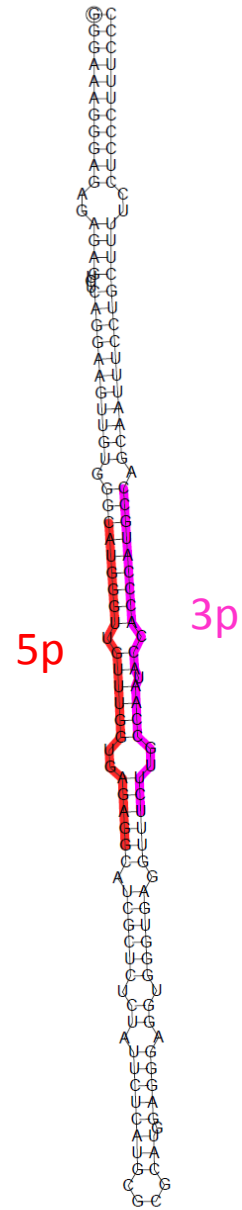

eun-MIR482-2

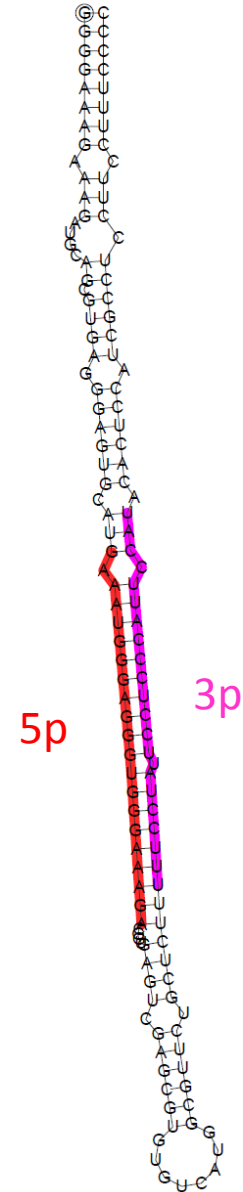

eun-MIR482-3

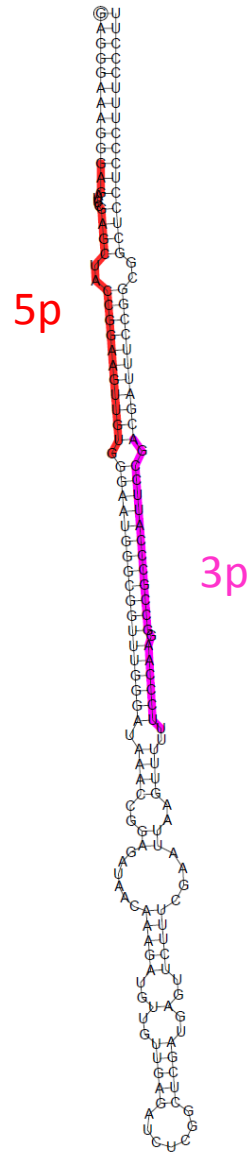

eun-MIR530

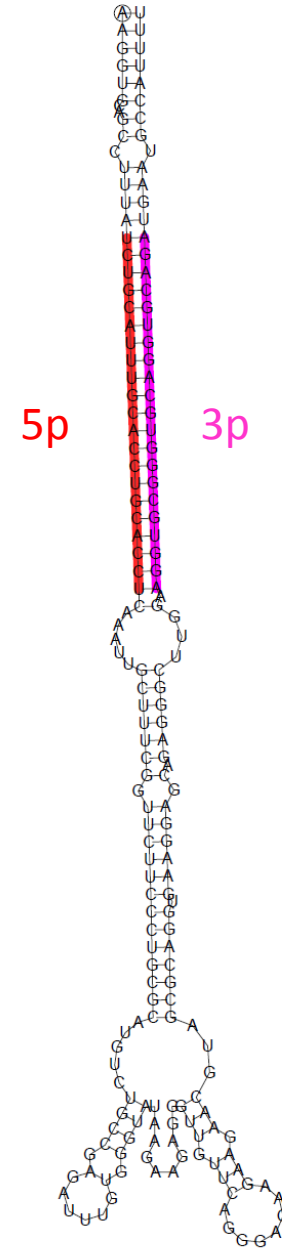

eun-MIR535-1

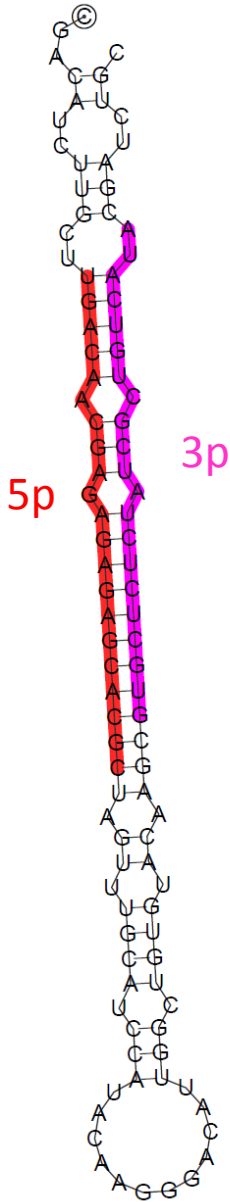

eun-MIR535-2

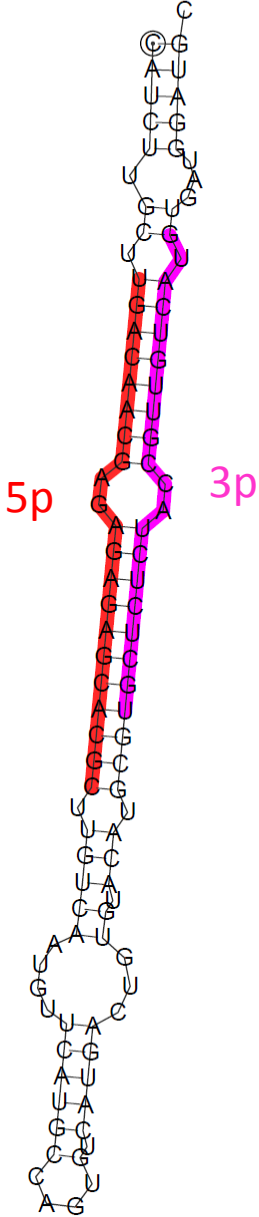

eun-MIR827

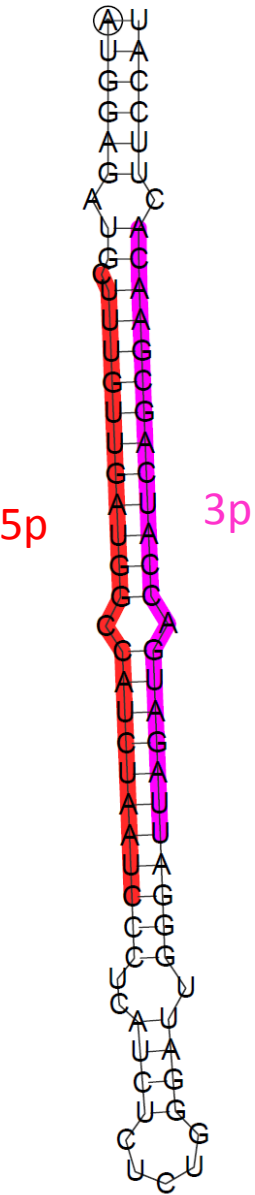

eun-nMIR001-1

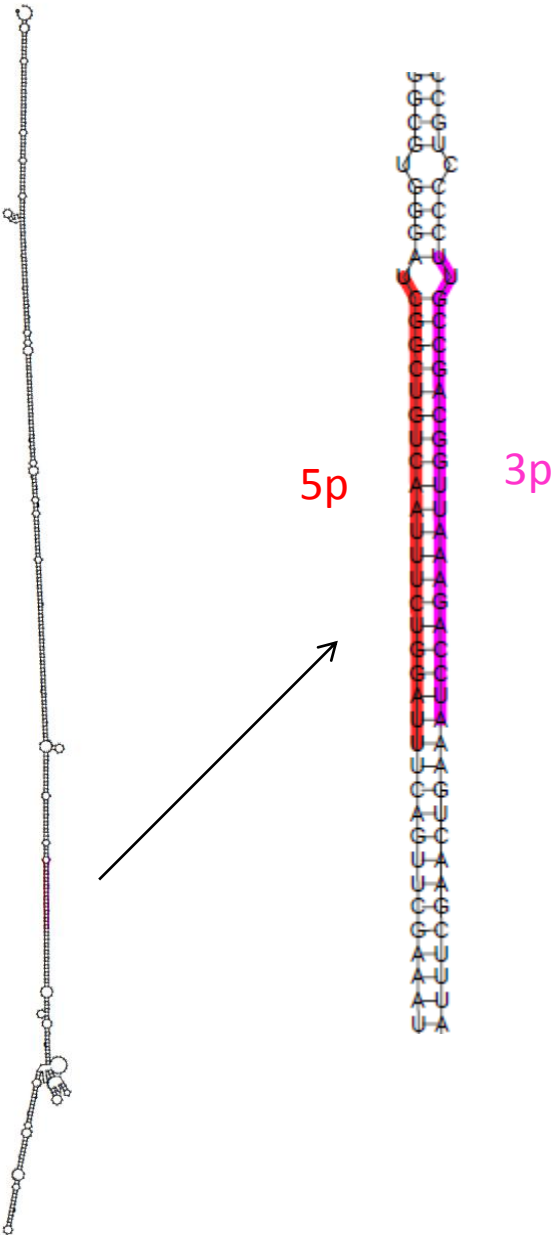

eun-nMIR001-2

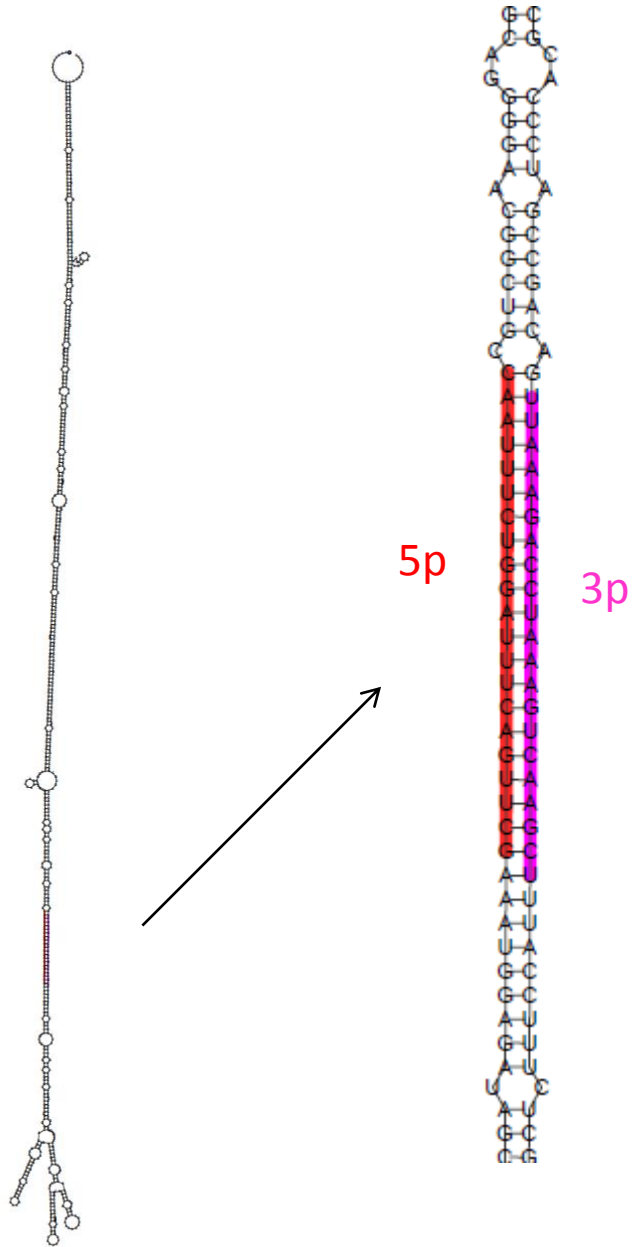

eun-nMIR002

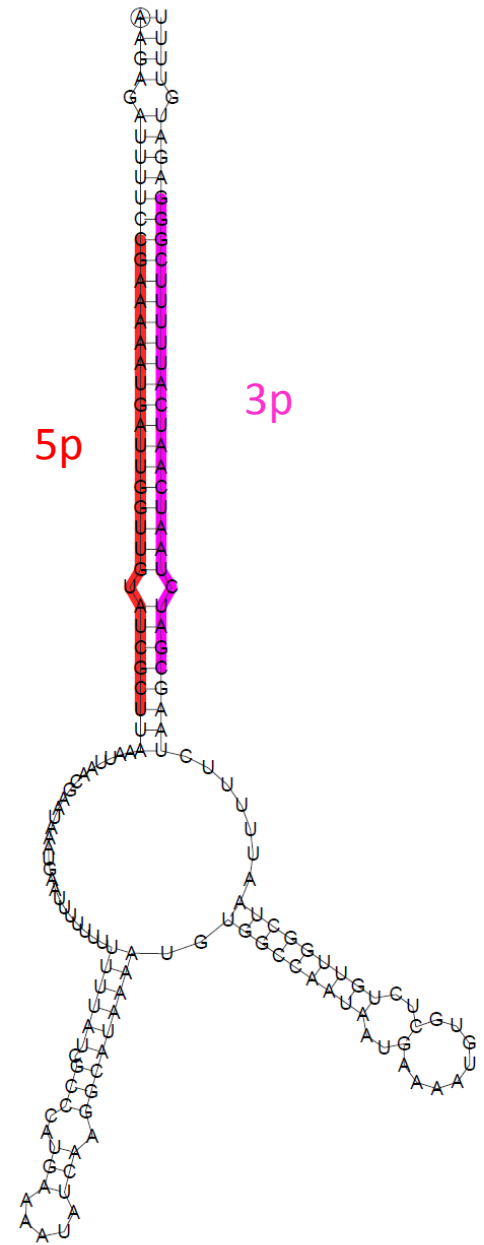

eun-nMIR003

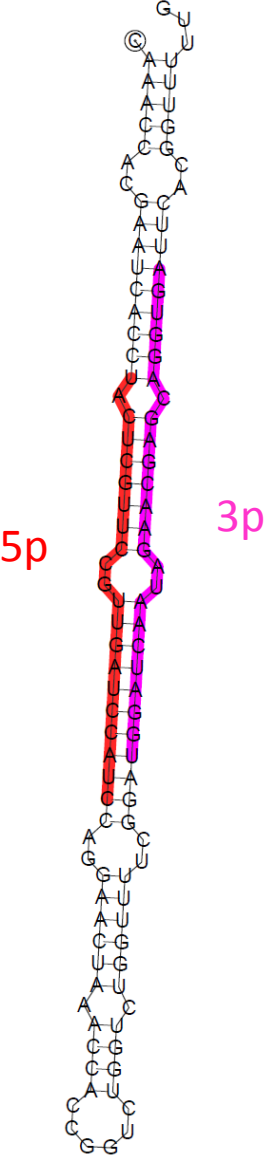

eun-nMIR004-1

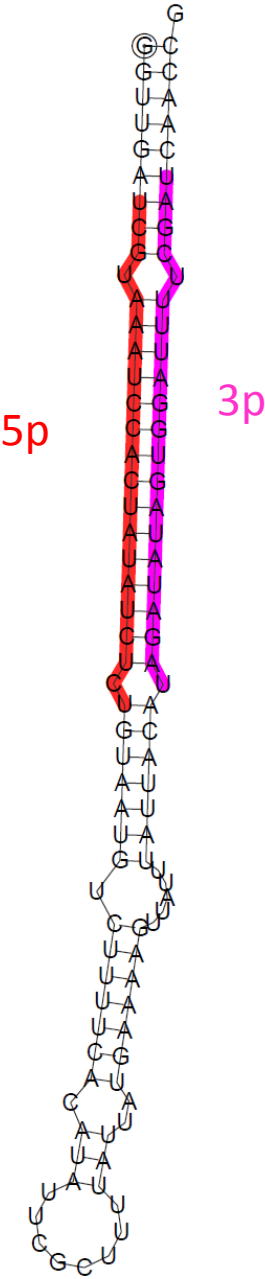





eun-nMIR006

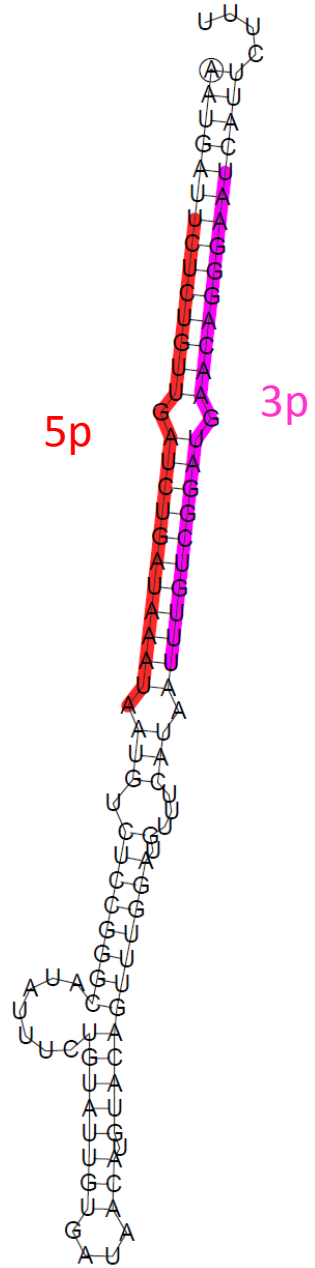

eun-nMIR007

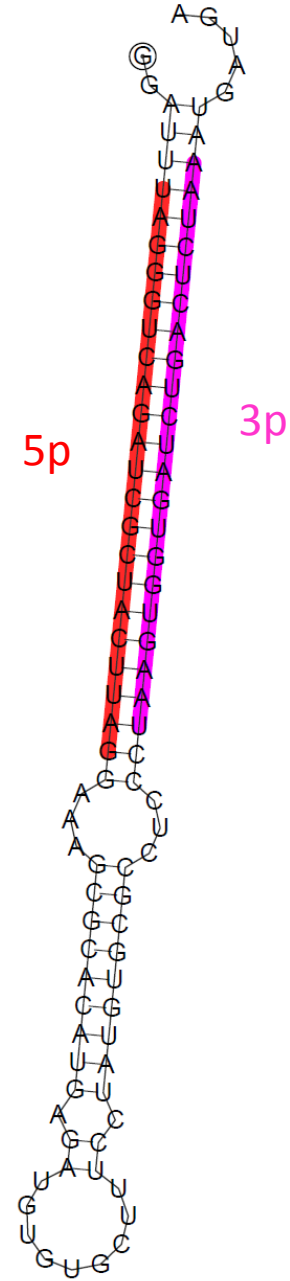



eun-nMIR010

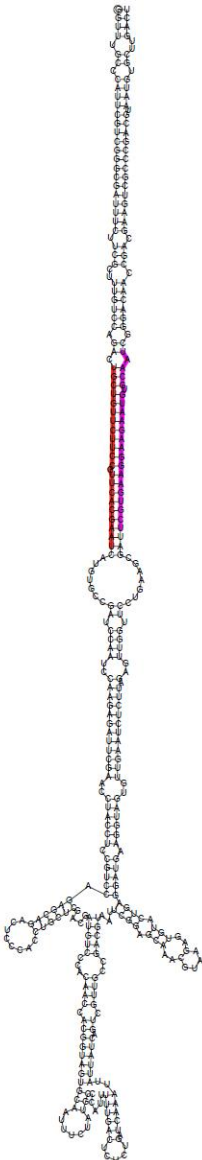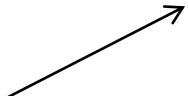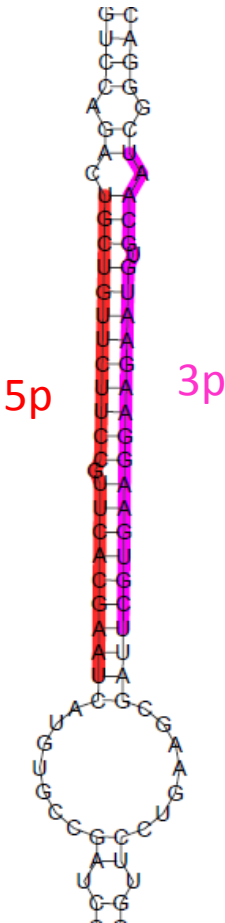

eun-nMIR011

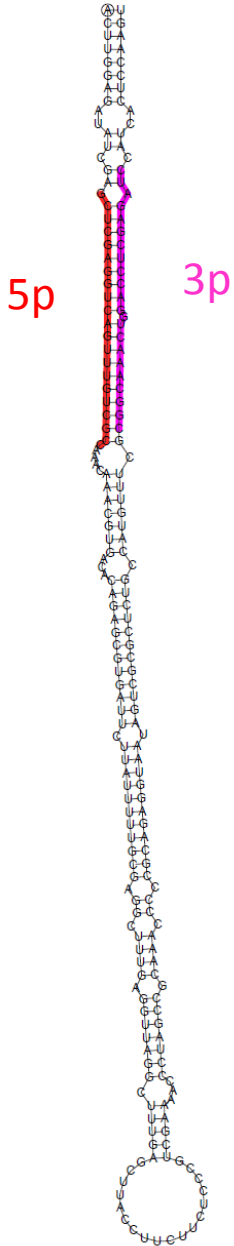

eun-nMIR012

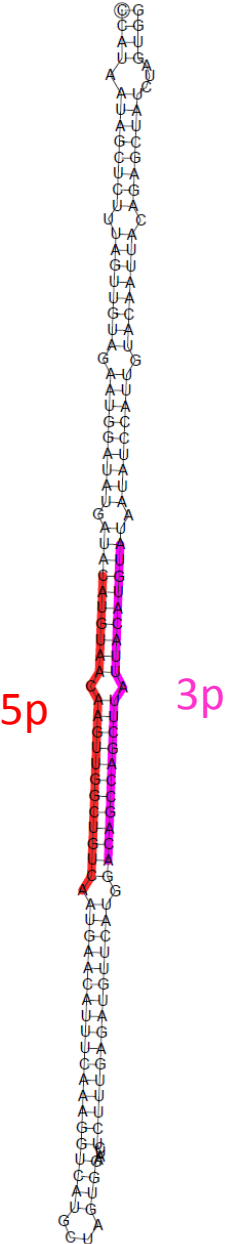

eun-nMIR013

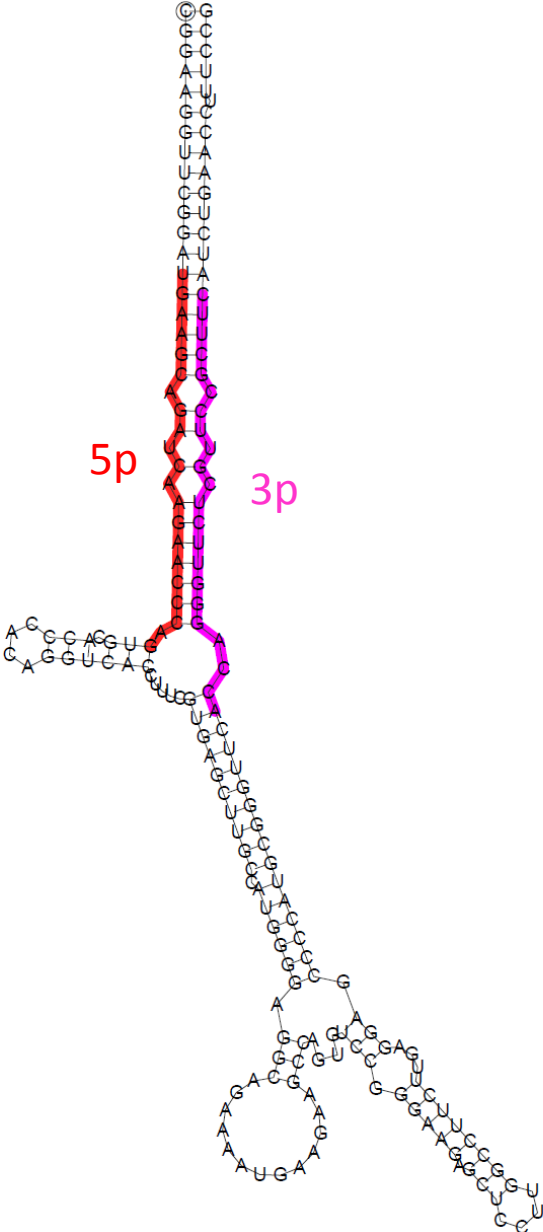

eun-nMIR014

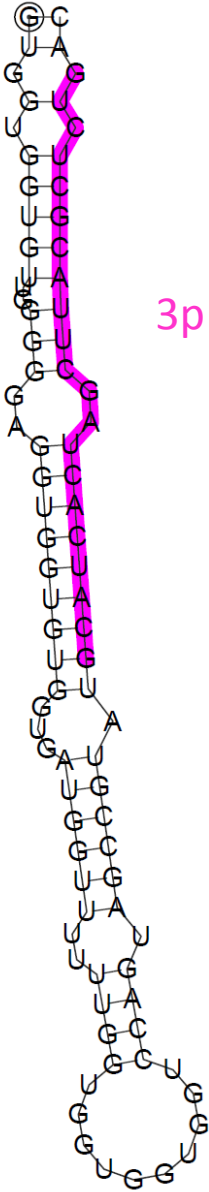

eun-nMIR015

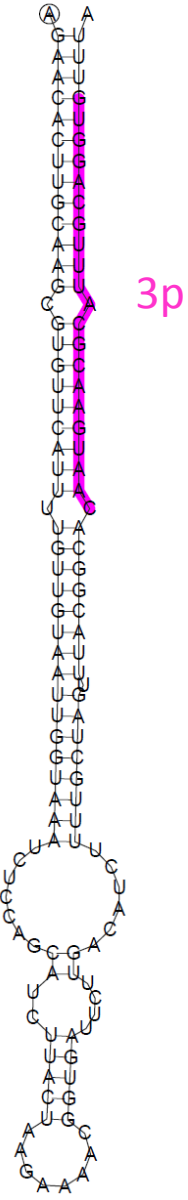

Supplement: pone.0049811.s002.pdf [file pone.0049811.s002.pdf]
