# Supplementary material for: Identification of MicroRNAs from Eugenia uniflora by High-Throughput Sequencing and Bioinformatics Analysis
Source: PLoS One. 2012 Nov 15;7(11):e49811. doi: 10.1371/journal.pone.0049811 (PMC3499529; doi:10.1371/journal.pone.0049811)
Supplement: Table S1 — Length distribution and read sequence abundance in the E. uniflora small RNA library. (XLS) [file pone.0049811.s005.xls]

## Sheet: S1
	Table S1. Length distribution and abundance of E. uniflora small RNA library
	Library	Total reads	Unique		Redundant
			Reads	%	Reads	%
	Size 18	278446	78016	28.0184	200430	71.9816
	Size 19	379911	91446	24.0704	288465	75.9296
	Size 20	604221	138609	22.9401	465612	77.0599
	Size 21	5425001	568061	10.4712	4856940	89.5288
	Size 22	1725301	280719	16.2707	1444582	83.7293
	Size 23	616505	291353	47.2588	325152	52.7412
	Size 24	3464753	2429440	70.1187	1035313	29.8813
	Size 25	265368	116578	43.9307	148790	56.0693
