# Supplementary material for: Identification of MicroRNAs from Eugenia uniflora by High-Throughput Sequencing and Bioinformatics Analysis
Source: PLoS One. 2012 Nov 15;7(11):e49811. doi: 10.1371/journal.pone.0049811 (PMC3499529; doi:10.1371/journal.pone.0049811)
Supplement: Table S2 — Abundance of predicted plant conserved miRNAs in the small RNA library of E. uniflora . (XLS) [file pone.0049811.s006.xls]

## Sheet: S2
	Table S2. Abundance of predicted known plant miRNAs in small RNA library of E. uniflora
	miRNA family	Total reads	Sequence	Length	Reads	Position	Species reported
	miR156	102212	TTGACAGAAGATAGAGAGCAC	21	83933	5p	ahy, aly, ath, bna, bol, bra, gma, gra, mtr, ptc, rco, sly, tcc, vun, vvi
			TTGACAGAAGAGAGTGAGCAC	21	14807	5p	gma
			TGACAGAAGAGAGTGAGCAC	20	2204	5p	aly, ath, bdi, csi, ctr, ghr, gma, mtr, osa, ppt, ptc, sbi, sof, tcc, vun, vvi, zma
			TGACAGAAGAGAGTGAGCACA	21	922	5p	bna, hvu, rco, ssl, ssp, tae
			TTGACAGAAGAGAGAGAGCAC	21	219	5p	ahy, far
			TTGACAGAAGATAGAGGGCAC	21	33	5p	mtr
			GCTCACTCTCTATCTGTCACC	21	22	3p	aly
			GCTCACTTCTCTTTCTGTCAGC	22	20	3p	zma
			CTGACAGAAGATAGAGAGCAC	21	14	5p	smo
			TTGACAGAAGAAAGAGAGCAC	21	10	5p	smo
			TGACAGAAGAGAGGGAGCAC	20	9	5p	ptc, vvi
			GCTCACTGCTCTATCTGTCACC	22	5	3p	zma
			TGACAGAAGAGAGAGAGCAC	20	4	5p	ahy, ath
			CGACAGAAGAGAGTGAGCAC	20	3	5p	aly, ath, smo
			TGACAGAAGAGAGAGAGCACA	21	2	5p	bdi, far, gma, mtr, osa, rco, sbi, tcc, zma
			GCTCACTTCTCTCTCTGTCAGT	22	2	3p	zma
			TGACAGAAGAGAGCGAGCAC	20	1	5p	sbi, zma
			GCTCACCCTCTATCTGTCAGT	21	1	3p	zma
			GCTCACTGCTCTTTCTGTCATC	22	1	3p	zma
	miR157	582	TGACAGAAGATAGAGAGCAC	20	488	5p	aly, aqc, ath
			GCTCTCTATGCTTCTGTCATC	21	94	3p	aly
	miR158	31	TCCCAAATGTAGACAAAGCA	20	31	3p	aly, ath
	miR159	238694	TTTGGATTGAAGGGAGCTCTA	21	235279	3p	ahy, aly, ath, bna, bra, csi, gma, mtr, ptc, pvu, rco, sly, vvi
			TTTGGATTGAAGGGAGCTCTT	21	1812	3p	aly, ath
			TTTGGATTGAAGGGAGCTCTG	21	1178	3p	far, hvu, osa, sbi, sof, ssp, tae, zma
			TTTGGATTGAAGGGAGCTCCT	21	200	3p	aly, ath
			CTTGGATTGAAGGGAGCTCTA	21	85	3p	osa
			TTGGATTGAAGGGAGCTCCA	20	81	3p	pta
			TTTGGACTGAAGGGAGCTCTA	21	43	3p	aqc
			CTTGGATTGAAGGGAGCTCT	20	7	3p	bdi
			GAGCTCCTATCATTCCAATGA	21	7	5p	zma
			ATTGGATTGAAGGGAGCTCCA	21	2	3p	osa
	miR160	600	TGGCATACAGGGAGCCAGGCA	21	293	3p	aau, aly, aqc, ath, bdi, bra, far, gma, mtr, osa, pab, ppt, ptc, rco, sbi, sly, smo, tae, tcc, ttu, vun, vvi, zma
			TGCCTGGCTCCCTGTATGCCA	21	293	5p	aau, aly, aqc, ath, bdi, bra, far, gma, mtr, osa, pab, ppt, ptc, rco, sbi, sly, smo, tae, tcc, ttu, vun, vvi, zma
			TGCCTGGCTCCCTGAATGCCA	21	11	5p	ahy, bdi, mtr, osa, ptc, rco, sbi, tcc
			TGCCTGGCTCCCTGTATGCC	20	1	5p	gma
			TGCCTGGCTCCTTGTATGCCA	21	1	5p	ppt
			TGCCTGGCTCCCTGCATGCCA	21	1	5p	ptc
	miR161	23	TTGAAAGTGACTACATCGGGG	21	13	5p	aly
			TGAAAGTGACTACATCGGGGT	21	7	5p	ath
			TCAATGCATTGAAAGTGACTA	21	2	5p	aly, ath
			TCAATGCACTGAAAGTGACTA	21	1	5p	bna
	miR162	10776	TCGATAAACCTCTGCATCCAG	21	10713	3p	aau, aly, ath, cpa, csi, ghr, gma, mtr, osa, ptc, rco, sbi, sly, tcc, vun, vvi
			TCGATAAACCTCTGCATCCA	20	31	3p	gma, zma
			GGAGGCAGCGGTTCATCGATC	21	24	5p	aly
			TCGATAAACCTCTGCATCCGG	21	4	3p	bdi
			TGGAGGCAGCGGTTCATCGATC	22	3	5p	csi
			TCGATAAGCCTCTGCATCCAG	21	1	3p	osa
	miR164	194	TGGAGAAGCAGGGCACGTGCA	21	186	5p	aly, ath, bdi, bna, bra, csi, ctr, ghr, gma, mtr, osa, ptc, rco, sbi, ssl, tae, tcc, vvi, zma
			TGGAGAAGCAGGGCACGTGC	20	3	5p	gma
			TGGAGAAGCAGGGTACGTGCA	21	2	5p	osa
			TGGAGAAGCAGGACACGTGAG	21	2	5p	sbi, zma
			TGGAGAAGCAGGGCACGTGCT	21	1	5p	bdi, cme, osa, sbi, zma
	miR165	1745	TCGGACCAGGCTTCATCCCCC	21	1656	3p	ath
			TCGGACCAGGCTTCATCCCC	20	89	3p	aly
	miR166	444090	TCGGACCAGGCTTCATTCCCC	21	381733	3p	aly, aqc, ath, bdi, bna, csi, ghr, gma, hvu, mtr, osa, ppt, pta, ptc, pvu, rco, sly, smo, ssl, tcc, vvi, zma
			TCTCGGACCAGGCTTCATTCC	21	35751	3p	bdi, gma
			TCGGACCAGGCTTCATTCCC	20	13648	3p	csi, sbi, tcc, zma
			GGAATGTTGTCTGGCTCGAGG	21	11016	5p	aly, csi, gma, zma
			TCGGACCAGGCTTCATTCCCG	21	529	3p	gma
			TCGGACCAGGCTTCATTCCCCC	22	393	3p	csi, ctr
			TCGGACCAGGCTTCATTCC	19	239	3p	vvi
			TCGGACCAGGCTTCATTCCTC	21	191	3p	aqc, mtr, osa, pab, sbi, ssl, tcc, zma
			CTCGGACCAGGCTTCATTCCC	21	169	3p	bdi
			TCGGACCAGGCTTCATTCCCT	21	113	5p	csi, osa
			GGAATGTTGTCTGGCTCGGGG	21	83	5p	zma
			TCGAACCAGGCTTCATTCCCC	21	63	3p	osa
			GGAATGTTGGCTGGCTCGAGG	21	56	5p	zma
			TCGGACCAGGCTTCATTCCTT	21	33	3p	pab, ptc
			GGAATGTTGTCTGGTTCAAGG	21	32	5p	zma
			TCGGACCAGGCTTCATTCCT	20	16	3p	aqc, sbi
			GGAATGTTGTTTGGCTCGAGG	21	8	5p	aly, gma
			TCGGACCAGGCTTCAATCCCT	21	7	3p	osa, sbi, zma
			TCGGACCAGGCTTCATTCCCGT	22	6	3p	crt, csi
			TCGGACCAGGCTTCATTCCCTT	22	2	3p	crt
			GGACTGTTGTCTGGCTCGAGG	21	2	5p	aly
	miR167	656093	TGAAGCTGCCAGCATGATCTGA	22	616862	5p	bdi, ccl, ctr, gma
			TGAAGCTGCCAGCATGATCTGG	22	32188	5p	aly, ath, rco
			TGAAGCTGCCAGCATGATCTC	21	5539	5p	vvi
			TGAAGCTGCCAGCATGATCTG	21	659	5p	csi, gma, gso, lja, mtr, osa, ptc, sbi, sof, ssp, vvi, zma
			TGAAGCTGCCAGCATGATCTA	21	583	5p	aly, ath, bdi, bna, bra, ghr, gma, mtr, osa, ptc, rco, sbi, sly, tae, tcc, vvi, zma
			TGAAGCTGCCAGCATGATCTAA	22	164	5p	bna
			TGAAGCTGCCAGCATGATCTT	21	98	5p	ahy, csi, gma, ptc, tcc
	miR168	16823	TCGCTTGGTGCAGGTCGGGAA	21	15826	5p	aly, ath, bna, ccl, crt, gma, mtr, ptc, rco, tcc, vun, vvi
			CCCGCCTTGCATCAACTGAAT	21	594	3p	aly, mtr
			TCGCTTGGTGCAGATCGGGAC	21	208	5p	bdi, hvu, osa, sbi, sof, ssp, zma
			TCGCTTGGTGCAGGTCGGGA	20	176	5p	cme
			ATTCAGTTGATGCAAGGCGGGATC	24	9	5p	aau
			TCGCTTGGTGCAGGTCGGG	19	8	5p	gma
			CCCGCCTTGCATCAAGTGAA	20	2	3p	zma
	miR169	1727	CAGCCAAGGATGACTTGCCGG	21	1677	5p	aly, aqc, ath, bdi, gma, mtr, osa, ptc, rco, sbi, sly, tcc, vun, vvi, zma
			CAGCCAAGGATGACTTGCCGA	21	28	5p	aly, ath, bdi, bna, gma, mtr, osa, ptc, sbi, sly, tcc, vvi, zma
			AGCCAAGGATGACTTGCCGG	20	17	5p	gma
			TAGCCAAGGATGACTTGCCGG	21	1	5p	bdi, osa, sbi, ssp, zma
			TAGCCAAGGATGACTTGCCTA	21	1	3p	aqc, bdi, bna, far, osa, ptc, sbi, sly, ssl, tcc, vvi, zma
			CAGCCAAGAATGACTTGCCGG	21	1	5p	gma
			TAGCCAAGGATGATTTGCCTGT	22	1	5p	bdi
			GGCAGTCTCCTTGGCTAG	18	1	3p	zma
	miR170	198	TATTGGCCTGGTTCACTCAGA	21	198	5p	aly, gma
	miR171	245	TTGAGCCGCGTCAATATCTCC	21	115	5p	ctr
			TGATTGAGCCGTGCCAATATC	21	112	3p	aqc, bdi, crt, far, gma, hvu, mtr, osa, ptc, rco, sbi, sly, tae, tcc, vvi, zma
			TTGAGCCGTGCCAATATCACG	21	10	3p	aly, ath, bna, bol, bra, gma, mtr, ptc, rco, sly, ssl, tae
			TTGAGCCGCGCCAATATCACT	21	4	3p	ssl, vvi
			TGTTGGCTCGGCTCACTCAGA	21	3	5p	zma
			TGATTGAGCCGTGCCAATATT	21	1	3p	mtr
	miR172	540	AGAATCTTGATGATGCTGCAT	21	495	3p	aly, aqc, ath, bdi, bol, bra, gma, mtr, osa, ptc, sly, ssl, tcc, vun
			GTAGCATCATCAAGATTCACA	21	33	5p	mtr
			GTAGCATCATCAAGATTCAC	20	8	5p	gma
			GGAATCTTGATGATGCTGCAG	21	1	3p	gma, ptc, rco, vvi
			TGAATCTTGATGATGCTACAT	21	1	3p	vvi
			AGAATCTTGATGATGCTGCA	20	1	3p	csi, gma, sbi, zma
			GCAGCACCATCAAGATTCACA	21	1	5p	aly
	miR173	1	TTCGCTTGCAGAGAGAAATCAC	22	1	5p	aly, ath
	miR319	1034	TTGGACTGAAGGGAGCTCCTT	21	390	3p	aly, ath, pvu, rco
			TTGGACTGAAGGGAGCTCCT	20	254	3p	ptc
			TTGGACTGAAGGGAGCTCCCT	21	158	3p	aau, aly, amg, aqc, ath, gma, rco, tae, vun, vvi
			TTGGACTGAAGGGTGCTCCCT	21	112	3p	bdi
			CTTGGACTGAAGGGAGCTCCT	21	98	3p	vun
			TTGGACTGAAGGGAGCTCCC	20	15	3p	ctr, gma, mtr, ptc
			TTTGGACTGAAGGGAGCTCCT	21	3	3p	csi, tcc, vvi
			TTGGACTGAAGGGTGCTCCC	20	3	3p	osa, sbi, zma
			CTTGGACTGAAGGGAGCTCCC	21	1	3p	ppt
	miR390	31	AAGCTCAGGAGGGATAGCGCC	21	22	5p	aly, ath, bdi, bna, cme, csi, ghr, gma, mtr, osa, ppt, ptc, rco, sbi, tcc, vvi, zma
			CGCTATCCATCCTGAGTTTCA	21	5	3p	aly
			CGCTATCCATCCTGAGTTTC	20	4	3p	gma
	miR393	70	TCCAAAGGGATCGCATTGATCT	22	66	5p	ghr, osa, zma
			TCCAAAGGGATCGCATTGATCC	22	2	5p	aly, ath, tcc, zma
			TCCAAAGGGATCGCATTGATC	21	1	5p	bdi, bna, gma, mtr, osa, ptc, rco, sbi, tcc, vvi
			TCAGTGCAATCCCTTTGGAAT	21	1	3p	osa
	miR394	128	TTGGCATTCTGTCCACCTCC	20	128	5p	ahy, aly, ath, bdi, csi, ghr, gma, osa, ptc, sbi, ssl, tcc, vvi, zma
	miR395	10547	CTGAAGTGTTTGGGGGAACTC	21	5859	3p	aly, ath, csi, gma, ptc, rco, tcc, vun, vvi
			GTGAAGTGTTTGGGGGAACTC	21	3253	3p	osa, sbi, tae, zma
			ATGAAGTGTTTGGGGGAACTC	21	1356	3p	mtr, sbi
			TGAAGTGTTTGGGGGAACTC	20	46	3p	bdi, tae
			TTGAAGTGTTTGGGGGAACTC	21	12	3p	mtr
			CTGAAGTGTTTGGGGGAACTCC	22	4	3p	sly
			ATGAAGTGTTTGGGGGAACTT	21	4	3p	mtr
			CTGAAGTGTTTGGGGGGACTC	21	3	3p	aly, ath
			GTGAAGTGTTTGGGTGAACTC	21	3	3p	zma
			GTGAAGTGCTTGGGGGAACTC	21	2	3p	osa, sbi
			GTGAATTGTTTGGGGGAACTC	21	2	3p	osa
			CTGAAGGGTTTGGAGGAACTC	21	1	3p	aqc, ptc
			CTGAAGTGTTTGGGGGGACTT	21	1	3p	aly
			GTGAAGTGTTTGGAGGAACTC	21	1	3p	osa, sbi, zma
	miR396	298025	TTCCACGGCTTTCTTGAACTG	21	217485	5p	ptc
			TTCCACAGCTTTCTTGAACTT	21	36611	5p	aly, aqc, ath, bcy, bdi, bgy, bna, ccl, gma, mtr, osa, pta, ptc, rco, sbi, tcc, zma
			TTCCACAGCTTTCTTGAACTG	21	23061	5p	aau, aly, amg, aqc, ath, bcy, bdi, bgy, csi, ghr, gma, lja, mtr, osa, ptc, sbi, sof, ssl, ssp, tcc, vvi, zma
			TTCCACAGCTTTCTTGAACT	20	17665	5p	vvi
			GTTCAATAAAGCTGTGGGAAG	21	2028	3p	aly, gma
			TTCAATAAAGCTGTGGGAAG	20	586	3p	gma
			TTCCACGGCTTTCTTGAACTT	21	218	5p	pab, ptc, tcc
			TCCACAGGCTTTCTTGAACTG	21	134	5p	bdi, far, osa
			TCCACAGCTTTCTTGAACTG	20	111	5p	gma
			TTCCACAGCTTTCTTGAACTA	21	99	5p	pab, vvi
			GCTCAAGAAAGCTGTGGGAGA	21	12	3p	gma
			GTTCAAGAAAGCTGTGGAAGA	21	6	3p	zma
			GTTCAATAAAGCTGTGGGAAA	21	5	3p	zma
			TTCCACGGCTTTCTTGAACC	20	2	5p	smo
			TTCCACAGCTTTCTTGAACTGT	22	2	5p	gma
	miR397	189	TCATTGAGTGCAGCGTTGATG	21	152	5p	aly, ath, bdi, csi, gma, osa, ptc, rco, sbi, ssl, tcc, vvi
			TCATTGAGTGCAGCGTTGATGT	22	25	5p	bna
			ATTGAGTGCAGCGTTGATGAA	21	10	3p	bdi
			ATTGAGTGCAGCGTTGATGA	20	1	5p	sly
			TCATTGAGTGCATCGTTGATG	21	1	5p	ath
	miR398	2599	TGTGTTCTCAGGTCGCCCCTG	21	2580	3p	aqc, bdi, gma, mtr, osa, ptc, rco, tcc, vvi
			TGTGTTCTCAGGTCGCCCCCG	21	11	3p	sbi, tae, zma
			TGTGTTCTCAGGTCACCCCTT	21	4	3p	aly, aqc, ath, bol, csi, ghr, gma, gra, mtr, osa, ptc, rco, tcc, vvi
			GGGGCGGACTGGGAACACATG	21	3	5p	zma
			TGTGTTCTCAGGTCACCCCTG	21	1	3p	aly, ath
	miR399	857	TGCCAAAGGAGATTTGCCCGG	21	576	3p	aly, ath, bna, csi, ptc, rco, tcc, vvi
			CGCCAAAGGAGAATTGCCCTG	21	219	3p	tcc
			TGCCAAAGGAGAGTTGCCCTG	21	31	3p	aly, ath, csi, mtr, osa, pvu, rco, sbi, tcc, vun, vvi, zma
			CGCCAAAGGAGAGTTGCCCTC	21	19	3p	ptc
			TGCCAAAGGAGAATTGCCCTG	21	10	3p	bdi, csi, osa, ptc, sbi, tcc, vun, vvi, zma
			TGCCAAAGGGGATTTGCCCGG	21	1	3p	sbi, zma
			GGGCTTCTCTTTCTTGGCAGG	21	1	5p	zma
	miR403	2	TTAGATTCACGCACAAACTCG	21	2	3p	aly, ath, csi, ptc, rco, tcc, vvi
	miR408	1367	TGCACTGCCTCTTCCCTGGC	20	1348	3p	gma
			CTGCACTGCCTCTTCCCTGGC	21	11	3p	osa, rco, sbi, sof, ssp, tae, zma
			TGCACTGCCTCTTCCCTGGCT	21	6	3p	ppt
			ATGCACTGCCTCTTCCCTGGC	21	1	3p	ahy, aly, ath, csi, gma, mtr, pta, ptc, vun, vvi
			CAGGGACGAGGCAGAGCATGG	21	1	5p	zma
	miR447	1	TATGGAAGAAATTGTAGTATT	21	1	3p	ath
	miR528	9	TGGAAGGGGCATGCAGAGGAG	21	9	5p	bdi, osa, sbi, ssp, zma
	miR529	1	GCTGTACCCTCTCTCTTCTTC	21	1	3p	zma
	miR535	62633	TGACAACGAGAGAGAGCACGC	21	62562	5p	osa, pab, ppt, rco, vvi
			TGACAACGATAGAGAGCACGC	21	69	5p	tcc
			TGACAACGAGAGAGAGCACGCG	22	2	5p	aqc
	miR824	172	TAGACCATTTGTGAGAAGGGA	21	167	5p	aly, ath, bna, bol, bra
			CCTTCTCATCGATGGTCTAGA	21	5	3p	aly
	miR827	1	TTAGATGACCATCAGCAAACA	21	1	3p	bdi, osa, ssp, zma
	miR828	11	TCTTGCTCAAATGAGTATTCCA	22	11	5p	ssl, vvi
	miR845	21	CGGCTCTGATACCAATTGATG	21	18	3p	ath
			TCGCTCTGATACCAAATTGATG	22	3	3p	ath
	miR858	361	TTCGTTGTCTGTTCGACCTTG	21	357	3p	ath
			TTTCGTTGTCTGTTCGACCTT	21	4	5p	aly, ath
	miR859	8	TCTCTCTGTTGTGAAGTCAAA	21	8	5p	ath
	miR866	1	ACAAAATCCGTCTTTGAAGA	20	1	3p	ath
	miR894	17	CGTTTCACGTCGGGTTCACC	20	17	5p	ppt
	miR3711	10	TGGCGCTAGAAGGAGGGCCT	20	10	5p	pab
	miR5054	1	TCCCCACGGTCGGCGCCA	18	1	3p	bdi
	miR5083	2	AGACTACAATTATCTGATCA	20	2	3p	osa
	miR5139	49	AAACCTGGCTCTGATACCA	19	49	5p	rgl
	miR5538	1	ACTGAACTCAATCACTTGCTGC	22	1	5p	osa
