# Supplementary material for: Identification of MicroRNAs from Eugenia uniflora by High-Throughput Sequencing and Bioinformatics Analysis
Source: PLoS One. 2012 Nov 15;7(11):e49811. doi: 10.1371/journal.pone.0049811 (PMC3499529; doi:10.1371/journal.pone.0049811)
Supplement: Table S3 — Predicted transcript targets of plant conserved miRNAs in E. uniflora . (XLS) [file pone.0049811.s007.xls]

## Sheet: S3
	Table S3. Predicted targets of plant conserved miRNAs in E. uniflora
	miRNA	Inhibition	Score*	Putative Function
	eun-MIR156	Cleavage	1	squamosa promoter-binding-like protein 2
		Cleavage	2.5	glutamate-1-semialdehyde -aminomutase
		Cleavage	2.5	arginine serine-rich splicing factor
		Cleavage	3	lipoxygenase 6
		Cleavage	3.5	rna recognition motif-containing protein
	eun-MIR159	Cleavage	3	adenylyl-sulfate kinase
	eun-MIR160	Cleavage	0	auxin response factor 17
	eun-MIR162	Cleavage	2	pentatricopeptide repeat-containing protein
		Translation	2.5	hydroxyphenylpyruvate reductase
		Cleavage	3.5	glycosyl transferase family 1 protein
	eun-MIR166	Translation	3.5	allantoate amidohydrolase
	eun-MIR167	Cleavage	3.5	dna mismatch repair protein msh2
		Cleavage	3	histidyl-trna synthetase
		Translation	2.5	tir-nbs-lrr resistance protein
		Cleavage	3.5	caax amino terminal protease family protein
		Cleavage	3.5	ubx domain-containing protein
		Translation	3.5	extra-large gtp-binding protein 3
	eun-MIR169	Translation	3	disease resistance protein rga2
		Cleavage	3	rj2 protein
		Translation	3.5	receptor-like protein kinase
	eun-MIR172	Cleavage	3	pentatricopeptide repeat-containing protein
		Cleavage	3.5	abc transporter c family member 2-like
	eun-MIR395	Cleavage	2	atp sulfurylase
		Cleavage	2.5	agenet domain-containing protein
		Cleavage	2.5	receptor-like protein kinase
		Cleavage	3.5	protein phosphatase 2c
		Cleavage	3.5	dead-like helicase domain-containing protein
	eun-MIR396	Cleavage	3	glutaryl- dehydrogenase
		Cleavage	3.5	pentatricopeptide repeat-containing protein
		Cleavage	3.5	transmembrane protein
		Cleavage	3.5	ascorbate peroxidase
		Cleavage	3.5	cysteine proteinase
		Translation	3.5	phosphoglycerate mutase
		Translation	3.5	e3 ubiquitin-protein ligase herc2-like
		Translation	3.5	sucrose phosphate synthase
	eun-MIR397	Translation	3	swi snf complex subunit swi3a
		Translation	3.5	zinc knuckle (cchc-type) family protein
		Cleavage	3.5	glycine dehydrogenase
	eun-MIR482	Cleavage	3.5	oxidoreductase family protein
		Cleavage	2.5	tmv resistance protein n-like
		Cleavage	2.5	ycf68 protein
		Cleavage	3.5	rna polymerase ii transcriptional coactivator kelp
		Cleavage	3.5	smr (small related) domain-containing protein
		Cleavage	3.5	kinase family protein
	eun-MIR530	Cleavage	3	restriction type ii-like protein
		Cleavage	3.5	s-acyltransferase tip1
		Cleavage	3.5	wall-associated receptor kinase-like 14-like
		Translation	3.5	transcription factor bim1
	eun-MIR535	Cleavage	3	ribosomal rna small subunit methyltransferase
		Cleavage	3.5	squamosa promoter-binding-like protein 2
	eun-MIR827	Translation	3.5	rna (guanine-9-)-methyltransferase domain-containing protein 2-like
		Cleavage	3.5	two-component response regulator arr11
	*psRNATarget value
